# Supplementary material for: Role of Topical Tacrolimus in the Management of Proctitis, Perianal Manifestations in Crohn's Disease, and Chronic Pouchitis: A Systematic Review
Source: HighWire-hosted journal article supplement (doi:10.1136/jim-2020-001699), 2021-02-23
Supplement: jim-2020-001699supp001_data_supplement.pdf [file jim-2020-001699supp001_data_supplement.pdf]

Supplementary Material

Figure 1: Prisma Flow Diagram

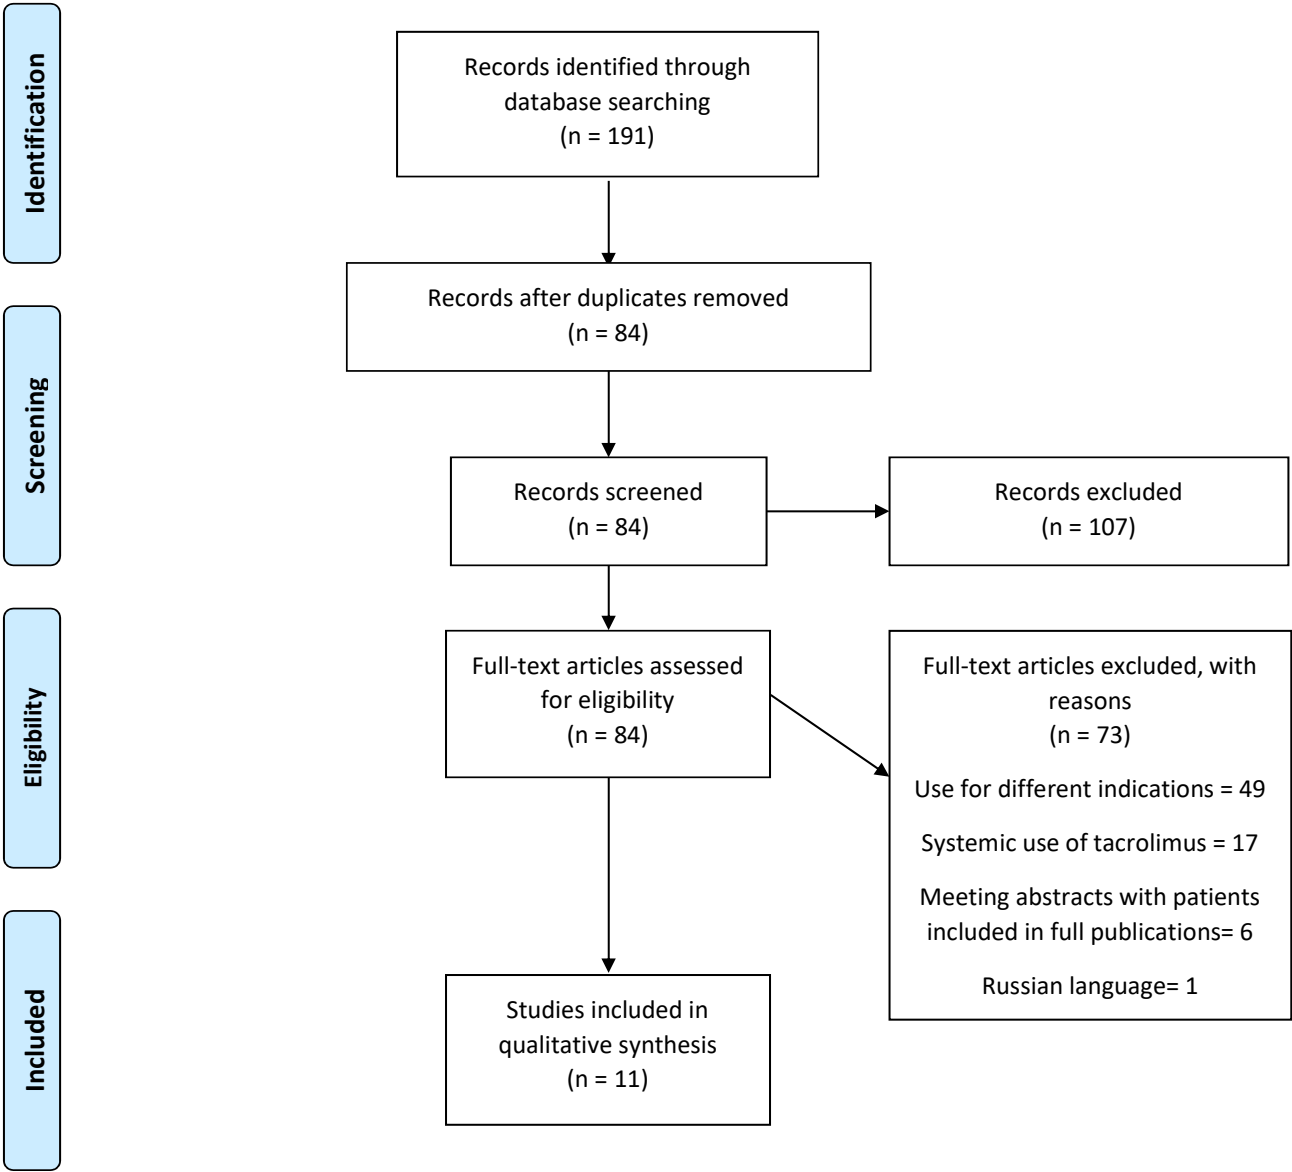

***Table 1***

| Author and Year                              | Study Design                 | No. of Patients                   | Disease Extent                                                   | Previous Treatment                                                                                                     | Intervention                                                   | Treatment Duration                                         | Trough level $\mu\text{g/L}$               | Response                                                                                        | Remission                                                                                                                  | Safety                                                                                                                                      |
|----------------------------------------------|------------------------------|-----------------------------------|------------------------------------------------------------------|------------------------------------------------------------------------------------------------------------------------|----------------------------------------------------------------|------------------------------------------------------------|--------------------------------------------|-------------------------------------------------------------------------------------------------|----------------------------------------------------------------------------------------------------------------------------|---------------------------------------------------------------------------------------------------------------------------------------------|
| <b><i>Proctitis</i></b>                      |                              |                                   |                                                                  |                                                                                                                        |                                                                |                                                            |                                            |                                                                                                 |                                                                                                                            |                                                                                                                                             |
| Lawrance <i>et al</i> , 2008 <sup>37</sup>   | Prospective                  | 8                                 | E1=4, E2=2, E3=2 *(1=IRA). (Maximal active inflammation 15-30cm) | Oral/rectal 5-ASA, rectal steroids, oral steroids, AZA, 6MP, IFX, Abatacept                                            | Tacrolimus ointment (dose range: total of 1.8mg - 6mg per day) | 8 weeks                                                    | Range: Undetectable – 6.9 ng/mL            | 6/8 (75%) - based on mMS <sup>1</sup> (reduction of $\geq 3$ points, rectal bleeding score 0-1) | 6/8 (75%) – based on mMS of 2 or less, no subscore >1                                                                      | Rectal burning (1/8). Subsided with dose reduction and achieved remission at week 8.                                                        |
| van Dieren <i>et al</i> , 2009 <sup>38</sup> | Prospective                  | 12                                | Proctitis                                                        | Local steroids either alone or in combination with local 5-aminosalicylate acid (5-ASA) treatment for at least 4 weeks | Tacrolimus suppositories. Dose: 2mg                            | 4 weeks                                                    | Range: Undetectable – 1.7 ng/mL            | 10/12 (83%) had improvement of disease activity based on Mayo Score                             | 8/12 (67%) showed endoscopic improvement (Mayo)                                                                            | No reported physical exam abnormalities, new disorders, or abnormal lab values.                                                             |
| Lawrance <i>et al</i> , 2017 <sup>39</sup>   | RCT<br>Tacrolimus vs placebo | 21<br>Tacrolimus:11<br>Placebo:10 | Up to 25cm from anal verge                                       | 5-ASA oral/topical, steroid oral/topical, MTX, AZA                                                                     | Tacrolimus ointment. Dose: 0.5 mg/mL, 3 mL twice a day         | 8 weeks                                                    | Range: Undetectable – 32.2 ng/mL           | (8/11 vs 1/10) 73% vs 10%; $P = .004$ (reduction in the Mayo Score of $\geq 3$ points)          | (5/11 vs 0/10) 45% vs 0%; $P = .015$ (Mayo Score $\leq 2$ , no subscore >1). Mucosal healing: (8/1) 73% vs 10%; $P = .004$ | (1) URTI (resolved spontaneously), (1) tremor (trough undetectable), (1) self-limiting dizziness, (1) headache (resolved with paracetamol). |
| Jaeger <i>et al</i> , 2018 <sup>40</sup>     | Retrospective                | 43                                | Up to 25cm from anal verge                                       | oral/rectal 5-ASA, rectal steroids, oral steroids, AZA, 6MP, IFX                                                       | Tacrolimus suppositories. Dose: 2mg twice a day                | Median duration of treatment was 76 days (from baseline to | Mean tacrolimus level: $5.5 \pm 3.9$ ng/mL | NA <sup>2</sup>                                                                                 | Colitis Activity Index $\leq 4$ : 26/43 (60%)                                                                              | (1) Creatinine increased to 1.5 mg/dl - normalized after stopping therapy,                                                                  |

<sup>1</sup> Modified Mayo Score<sup>2</sup> Not Available/not reported

|                                          |                                         |                                                                                                           |                            |                                                                                                                       |                                                                                                            | the last documented visit)        |                                                                         |                                                                                                                                             |                                                                                                                                                                                                       | (4) hand tremors, (3) headaches, (1) fatigue                                                             |
|------------------------------------------|-----------------------------------------|-----------------------------------------------------------------------------------------------------------|----------------------------|-----------------------------------------------------------------------------------------------------------------------|------------------------------------------------------------------------------------------------------------|-----------------------------------|-------------------------------------------------------------------------|---------------------------------------------------------------------------------------------------------------------------------------------|-------------------------------------------------------------------------------------------------------------------------------------------------------------------------------------------------------|----------------------------------------------------------------------------------------------------------|
| Lie <i>et al</i> , 2019 <sup>41</sup>    | RCT<br><br>Tacrolimus vs beclomethasone | 85<br><br>Tacrolimus: 43<br>Beclomethasone: 42                                                            | Up to 20cm from anal verge | Mesalamine-refractory proctitis, or recurring proctitis                                                               | Tacrolimus suppository 2mg daily, or beclomethasone suppository 3 mg once daily                            | 4 weeks                           | Mean tacrolimus level was $2.7 \pm 2.8$ ng/mL (range: 0–12.8) at Week 4 | Clinical response (reduction in the Mayo Score of $\geq 3$ points)<br>Tacrolimus: 22/35 (62.9%), Beclomethasone: 22/37 (59.5%).<br>P=0.812. | Clinical remission (Mayo Score $\leq 2$ , no subscore $>1$ ):<br>Tacro: 16/35 (45.7%), Becl.: 15/39 (38.5%).<br>P=0.638.<br>Endoscopic remission: Tacro 11/37 (29.7%), Becl.: 5/40 (12.5%)<br>P=0.092 | Tacrolimus: 29 events (21 patients) = 48.8%, Beclomethasone: 18 events (14 patients) = 33.3%.<br>P=0.188 |
| Fehily <i>et al</i> , 2019 <sup>42</sup> | Retrospective                           | 17 patients<br><br>(12/5: UC/CD) severe refractory proctitis. Four patients with inflammatory strictures. | NA                         | All patients had failed immunosuppressive therapy, most had failed both a thiopurine (88%) and biologic therapy (71%) | Tacrolimus enemas. Dose: 1–4 mg, according to tolerance, followed by 1–3 mg three times weekly maintenance | Median duration: 20 weeks (3–204) | NA <sup>2</sup>                                                         | 16/17 (94%) clinical and biochemical improvement. 13/17 (79%) endoscopic improvement                                                        | Endoscopic remission: 10/17 (58.82%). In all four patients with strictures, the inflammation resolved and the stricture became endoscopically passable without dilatation.                            | 3/17 (18%) - disease flare.                                                                              |
| Smith <i>et al</i> , 2019 <sup>43</sup>  | Retrospective                           | 21<br><br>(20 UC, 1 CD)                                                                                   | Proctitis                  | 5-ASA topical/Oral, steroid topical, MTX, AZA, biologics                                                              | Tacrolimus suppository. Dose: 2mg twice a day                                                              | 4 weeks                           | NA <sup>2</sup>                                                         | 16/21 (76.1%) - clinical response (PRO2 decrease by $>2$ points)                                                                            | 13/21 (62%) - clinical remission (PRO2 = 0)                                                                                                                                                           | None                                                                                                     |

**Table 2**

| Author and Year                                                                     | Study Design                                  | No. of Patients                        | Disease Extent                                                                                                                         | Previous Treatment                                                                                                         | Intervention                                                                                                                                                                                                                                                                              | Treatment Duration | Trough level µg/L               | Response                                                                                                                                                                                                                                           | Remission                                                                                                                           | Safety                                                                                                                                                     |
|-------------------------------------------------------------------------------------|-----------------------------------------------|----------------------------------------|----------------------------------------------------------------------------------------------------------------------------------------|----------------------------------------------------------------------------------------------------------------------------|-------------------------------------------------------------------------------------------------------------------------------------------------------------------------------------------------------------------------------------------------------------------------------------------|--------------------|---------------------------------|----------------------------------------------------------------------------------------------------------------------------------------------------------------------------------------------------------------------------------------------------|-------------------------------------------------------------------------------------------------------------------------------------|------------------------------------------------------------------------------------------------------------------------------------------------------------|
| <b><i>Crohn's disease with perianal manifestations (fissuring, fistulizing)</i></b> |                                               |                                        |                                                                                                                                        |                                                                                                                            |                                                                                                                                                                                                                                                                                           |                    |                                 |                                                                                                                                                                                                                                                    |                                                                                                                                     |                                                                                                                                                            |
| Casson <i>et al</i> , 2000 <sup>44</sup>                                            | Prospective                                   | 6 (pediatrics)                         | 2/6: highly destructive perianal disease, 3/6: perianal ulcers, 1/6: perianal fistula                                                  | Steroids (oral/topical) 6/6, topical cyclosporine 3/6, AZA 3/6                                                             | Tacrolimus ointment. Dose: 0.5mg/g twice a day.                                                                                                                                                                                                                                           | 4 weeks – 6 months | Undetectable                    | NA <sup>2</sup>                                                                                                                                                                                                                                    | 5/6 (83.3%) clinical remission (2 highly destructive perianal disease, 2 perianal ulcer, 1 perianal fistula). 1/6 (16.7%) no effect | None                                                                                                                                                       |
| Hart <i>et al</i> , 2006 <sup>45</sup>                                              | RCT<br><br>Tacrolimus vs placebo <sup>3</sup> | 19<br><br>Tacrolimus: 10<br>Placebo: 9 | Fistulizing disease: 12 (6 on active treatment and 6 on placebo)<br><br>Ulcerating disease: 7 (4 on active treatment and 3 on placebo) | Local steroids either alone or in combination with local 5-aminosalicylate acid (5-ASA) treatment, Thiopurines, Infliximab | Tacrolimus ointment. Dose: 1 mg/g (0.1%) twice a day. (Ointment was applied around the external opening of fistulas and to any associated inflamed or indurated skin. For those with ulceration, ointment was applied to inflamed and indurated areas, both perianally and intra-anally.) | 12 weeks           | Range: Undetectable – 4.2 ng/mL | Fistula: 1/6 (16.67%) complete response, 2/6 (33.33%) global improvement (clinical improvement) vs placebo. (1/6 partial response, 2/6 global improvement - all of them had setons in place). Ulceration: 3/4 (75%) global improvement (clinical), | Fistula: 1/6 (16.67%) complete response on tacrolimus vs 0/6 with placebo. Ulcers: 0/4 vs 0/3.                                      | Skin irritation (1), abscess (2), Temporary reduction in kidney function W8 and normalized at W12 without intervention (1) (continued tacrolimus till W12) |

<sup>2</sup> Not Available/not reported

|                                          |               |                |                |                               |                                              |          |                 |                                                                     |                                                                                                                     |                 |
|------------------------------------------|---------------|----------------|----------------|-------------------------------|----------------------------------------------|----------|-----------------|---------------------------------------------------------------------|---------------------------------------------------------------------------------------------------------------------|-----------------|
|                                          |               |                |                |                               |                                              |          |                 | none achieved complete healing vs placebo. 0/3 had any improvement. |                                                                                                                     |                 |
| Niyogi <i>et al</i> , 2010 <sup>46</sup> | Retrospective | 7 (pediatrics) | Fistula-in-ano | Amoxicillin – clavulanic acid | Tacrolimus ointment. Dose: 0.03% twice a day | 12 weeks | NA <sup>2</sup> | NA <sup>2</sup>                                                     | 6/7 (85.71%) - remission (defined as no active inflammation on magnetic resonance imaging, patient is asymptomatic) | NA <sup>2</sup> |

***Table 3***

| Author and Year                                       | Study Design | No. of Patients | Disease Extent                                     | Previous Treatment                          | Intervention                                                   | Treatment Duration | Trough level µg/L              | Response                                                                    | Remission                                                                                                                       | Safety                                                                |
|-------------------------------------------------------|--------------|-----------------|----------------------------------------------------|---------------------------------------------|----------------------------------------------------------------|--------------------|--------------------------------|-----------------------------------------------------------------------------|---------------------------------------------------------------------------------------------------------------------------------|-----------------------------------------------------------------------|
| <b><i>Chronic Antibiotic-Refractory Pouchitis</i></b> |              |                 |                                                    |                                             |                                                                |                    |                                |                                                                             |                                                                                                                                 |                                                                       |
| Uchino <i>et al</i> , 2013 <sup>47</sup>              | Prospective  | 10              | Chronic antibiotics-refractory pouchitis. PDAI ≥ 7 | Ciprofloxacin, metronidazole, topical 5-ASA | Tacrolimus enema. Dose: 0.08mg/kg = 4-5mg/day. Once daily (AM) | 8 weeks            | Range: 1.2-8.2 ng/mL at week 8 | 9/10 (90%) pouchitis clinical sub-score decrease of more than three points. | 7/10 (70%) pouchitis clinical sub-score of zero<br><br>PDAI score decreased from 15.9 +/- 0.8 to 7.8 +/- 0.8 ( <i>p</i> < 0.01) | 3/10 (30%) Mild burning in the pouch; did not lead to discontinuation |

## Supplementary Material

Assessing risk of bias in included studies using Higgins Scale <sup>36</sup>

| Study ID                              | Study design            | Sampling design | Patients enrolled consecutively | Adequate sequence generation | Allocation concealment | Blinding     | Free of selective reporting | Selection bias |
|---------------------------------------|-------------------------|-----------------|---------------------------------|------------------------------|------------------------|--------------|-----------------------------|----------------|
| Lawrance, et al. 2008 <sup>37</sup>   | Pilot study             | Prospective     | Yes                             | Not used                     | Not used               | Not reported | Yes                         | Moderate       |
| van Dieren, et al. 2009 <sup>38</sup> | Clinical trial (phase1) | Prospective     | Not reported                    | Not used                     | Not used               | Not reported | Yes                         | Moderate       |
| Lawrance, et al. 2017 <sup>39</sup>   | RCT                     | Prospective     | Not reported                    | Yes                          | Yes                    | Yes          | Yes                         | Low            |
| Jaeger, et al. 2018 <sup>40</sup>     | Experimental trial      | Retrospective   | Yes                             | Not used                     | Not used               | Not used     | Yes                         | Moderate       |
| Lie, et al. 2018 <sup>41</sup>        | RCT                     | Prospective     | Not reported                    | Yes                          | Yes                    | Yes          | Yes                         | Low            |
| Fehily, et al. 2019 <sup>42</sup>     | Experimental trial      | Retrospective   | Yes                             | Not used                     | Not used               | Not used     | Yes                         | Moderate       |
| Smith, et al. 2019 <sup>43</sup>      | Experimental trial      | Retrospective   | Yes                             | Not used                     | Not used               | Not used     | Yes                         | Moderate       |
|                                       |                         |                 |                                 |                              |                        |              |                             |                |
| Casson, et al. 2000 <sup>44</sup>     | Experimental trial      | Prospective     | Yes                             | Not used                     | Not used               | Not used     | Yes                         | Moderate       |
| Hart, et al. 2007 <sup>45</sup>       | RCT                     | Prospective     | Not reported                    | Unclear                      | Unclear                | Yes          | Yes                         | Moderate       |
| Niyogi, et al. 2009 <sup>46</sup>     | Experimental trial      | Retrospective   | Yes                             | Not used                     | Not used               | Not used     | Yes                         | Moderate       |
|                                       |                         |                 |                                 |                              |                        |              |                             |                |
| Uchino, et al. 2013 <sup>47</sup>     | Experimental trial      | Prospective     | Yes                             | Not used                     | Not used               | Not used     | Yes                         | Moderate       |
